# Supplementary material for: Hetero-bimetallic paddlewheel complexes for enhanced CO 2 reduction selectivity in MOFs: a first principles study
Source: Royal Society of Chemistry journal article supplement (doi:10.1039/d3cp05694e), 2024-01-01
Supplement: d3cp05694e1.xlsx [file d3cp05694e1.xlsx]

## Sheet: Adsorbate
INT	S	E	H	G
H2	1	-1.17201	-1.15886	-1.17366
½ H2	2	-0.586003	-0.57943	-0.586829
O	3	-75.0869	-75.0845	-75.1018
OH	2	-75.7594	-75.7477	-75.7679
H2O	1	-76.4537	-76.4287	-76.4502
CO2	1	-188.656	-188.641	-188.665
OCOH	2	-189.163	-189.137	-189.166
OCHO	2	-189.151	-189.129	-189.158
CO	1	-113.345	-113.336	-113.359
HOCOH	1	-189.756	-189.719	-189.747
OCH2O	3	-189.662	-189.631	-189.66
HCOOH	1	-189.826	-189.788	-189.816
HCO	2	-113.886	-113.87	-113.895
COH	2	-113.821	-113.804	-113.83
HOCH2O	2	-190.341	-190.295	-190.326
HOCHOH	2	-190.346	-190.298	-190.328
CH2O	1	-114.539	-114.509	-114.534
HCOH	1	-114.454	-114.424	-114.449
HOCH2OH	1	-191.006	-190.945	-190.975
CH3O	2	-115.087	-115.044	-115.071
H2COH	2	-115.092	-115.051	-115.078
CH3OH	1	-115.756	-115.7	-115.728
C	3	-37.8483	-37.8459	-37.8628
CH	2	-38.4862	-38.4763	-38.4964
CH2	3	-39.1614	-39.1405	-39.1634
CH3	2	-39.8457	-39.8126	-39.8368
CH4	1	-40.5259	-40.4772	-40.5
1,1-EthaneDiol	1	-230.337	-230.246	-230.279
1,2-EthaneDiol	1	-230.318	-230.227	-230.261
Ethanol	1	-155.082	-154.997	-155.027
1,1,2-EthaneTriol	1	-305.573	-305.476	-305.512
Ethene	1	-78.604	-78.5491	-78.5752
CH2_H2COH	2	-154.409	-154.339	-154.37
CH3_CH2	2	-79.1736	-79.1105	-79.1381
Ethane	1	-79.8448	-79.7654	-79.7929
H2COH_OCOH	1	-304.393	-304.32	-304.355
H2COH_CO	2	-228.458	-228.404	-228.437
H2COH_HCO	1	-229.114	-229.048	-229.08
H2COH_H2CO	2	-229.65	-229.573	-229.607
AceticAcid	1	-229.158	-229.091	-229.124
OCOH_OCOH	1	-378.459	-378.404	-378.439
OCOH_CO	2	-302.522	-302.486	-302.521
OCOH_HCO	1	-303.175	-303.127	-303.16
OCOH_H2CO	2	-303.725	-303.667	-303.701
H2COH_HOCOH	2	-304.912	-304.828	-304.865
H2COH_OCHOH	2	-304.908	-304.826	-304.863
CH2_OCOH	2	-228.495	-228.442	-228.475
H2COH_HCOH	2	-229.66	-229.583	-229.618
CH2_HCO	2	-153.218	-153.171	-153.2
H2COH_CH2	2	-154.409	-154.339	-154.373

## Sheet: CuMn 
OnCu							OnMn
INT	S	Charge	E	H	G		INT	S	Charge	E	H	G
CAT	7	0	-3705.53	-3705.3	-3705.37		CAT	7	0	-3705.53	-3705.3	-3705.37
CAT	5	0	-3705.53	-3705.3	-3705.37		CAT	5	0	-3705.53	-3705.3	-3705.37
CAT	3	0	-3705.5	-3705.27	-3705.34		CAT	3	0	-3705.5	-3705.27	-3705.34
CAT	4	-1	-3705.62	-3705.39	-3705.46		CAT	4	-1	-3705.62	-3705.39	-3705.46
CAT	6	-1	-3705.64	-3705.42	-3705.48		CAT	6	-1	-3705.64	-3705.42	-3705.48
H	4	0	-3706.06	-3705.83	-3705.9		H	4	0	-3706.08	-3705.85	-3705.92
H	6	0	-3706.05	-3705.82	-3705.89		H	6	0	-3706.08	-3705.85	-3705.92
H2	5	0	-3706.71	-3706.46	-3706.54		H2	5	0	-3706.72	-3706.47	-3706.55
CO2	5	0	-3894.19	-3893.95	-3894.02		CO2	5	0	-3894.2	-3893.96	-3894.04
CO2	4	-1	-3894.28	-3894.04	-3894.11		CO2	4	-1	-3894.2	-3893.96	-3894.04
CO2	6	-1	-3894.3	-3894.06	-3894.13		CO2	6	-1	-3894.31	-3894.07	-3894.14
OCOH	4	0	-3894.72	-3894.47	-3894.54		OCOH	4	0	-3894.74	-3894.48	-3894.56
OCOH	6	0	-3894.72	-3894.47	-3894.54		OCOH	6	0	-3894.74	-3894.48	-3894.56
OCHO	4	0	-3894.75	-3894.49	-3894.57		OCHO	4	0	-3894.77	-3894.52	-3894.6
OCHO	6	0	-3894.75	-3894.5	-3894.57		OCHO	6	0	-3894.78	-3894.52	-3894.6
CO	5	0	-3818.9	-3818.67	-3818.74		CO	5	0	-3818.91	-3818.67	-3818.74
HOCOH	3	0	-3895.27	-3895.01	-3895.08		HOCOH	3	0	-3895.29	-3895.02	-3895.1
HOCOH	5	0	-3895.32	-3895.06	-3895.13		HOCOH	5	0	-3895.34	-3895.07	-3895.15
OCH2O	5	0	-3895.25	-3894.99	-3895.07		OCH2O	5	0	-3895.29	-3895.02	-3895.1
OCH2O	7	0	-3895.25	-3894.99	-3895.07		OCH2O	7	0	-3895.28	-3895.02	-3895.1
HCOOH	5	0	-3895.37	-3895.1	-3895.18		HCOOH	5	0	-3895.39	-3895.13	-3895.2
HCO	4	0	-3819.44	-3819.2	-3819.27		HCO	4	0	-3819.46	-3819.22	-3819.29
HCO	6	0	-3819.44	-3819.2	-3819.27		HCO	6	0	-3819.46	-3819.21	-3819.29
COH	4	0	-3819.39	-3819.15	-3819.22		COH	4	0	-3819.41	-3819.16	-3819.24
COH	6	0	-3819.39	-3819.15	-3819.22		COH	6	0	-3819.36	-3819.12	-3819.19
HOCH2O	4	0	-3895.92	-3895.64	-3895.72		HOCH2O	4	0	-3895.94	-3895.66	-3895.75
HOCH2O	6	0	-3895.91	-3895.63	-3895.71		HOCH2O	6	0	-3895.95	-3895.67	-3895.75
HOCHOH	4	0	-3895.89	-3895.61	-3895.69		HOCHOH	4	0	-3895.91	-3895.64	-3895.72
HOCHOH	6	0	-3895.88	-3895.61	-3895.67		HOCHOH	6	0	-3895.91	-3895.64	-3895.72
CH2O	5	0	-3820.08	-3819.82	-3819.9		CH2O	5	0	-3820.1	-3819.84	-3819.92
HCOH	3	0	-3819.98	-3819.72	-3819.79		HCOH	3	0	-3820.03	-3819.77	-3819.85
HCOH	5	0	-3820.04	-3819.78	-3819.85		HCOH	5	0	-3820.03	-3819.77	-3819.84
HCOH	7	0	-3820.02	-3819.76	-3819.84		HOCH2OH	5	0	-3896.58	-3896.29	-3896.37
HOCH2OH	5	0	-3896.56	-3896.27	-3896.34		CH3O	4	0	-3820.69	-3820.42	-3820.5
CH3O	4	0	-3820.67	-3820.39	-3820.47		CH3O	6	0	-3820.7	-3820.42	-3820.5
CH3O	6	0	-3820.65	-3820.38	-3820.46		H2COH	4	0	-3820.68	-3820.41	-3820.48
H2COH	4	0	-3820.64	-3820.37	-3820.44		H2COH	6	0	-3820.68	-3820.4	-3820.48
H2COH	6	0	-3820.64	-3820.37	-3820.44		CH3OH	5	0	-3821.33	-3821.04	-3821.12
CH3OH	5	0	-3821.3	-3821.02	-3821.09		C	3	0	-3743.45	-3743.22	-3743.29
C	5	0	-3743.41	-3743.18	-3743.25		C	5	0	-3743.41	-3743.18	-3743.25
C	7	0	-3743.42	-3743.2	-3743.27		CH	4	0	-3744.09	-3743.85	-3743.92
CH	6	0	-3744.08	-3743.84	-3743.91		CH	6	0	-3744.08	-3743.84	-3743.91
CH	8	0	-3744.05	-3743.81	-3743.88		CH2	5	0	-3744.75	-3744.5	-3744.57
CH2	3	0	-3744.73	-3744.48	-3744.55		CH2	7	0	-3744.75	-3744.5	-3744.57
CH2	5	0	-3744.74	-3744.49	-3744.56		CH3	4	0	-3745.43	-3745.16	-3745.23
CH3	4	0	-3745.4	-3745.14	-3745.21		CH3	6	0	-3745.43	-3745.16	-3745.24
CH3	6	0	-3745.39	-3745.13	-3745.2		CH4	5	0	-3746.07	-3745.8	-3745.87
CH4	5	0	-3746.06	-3745.79	-3745.86
O	3	0	-3780.68	-3780.45	-3780.52		O	5		-3780.74	-3780.5	-3780.58
O	5	0	-3780.66	-3780.43	-3780.51		O	7	0	-3780.7	-3780.47	-3780.54
OH	4	0	-3781.35	-3781.11	-3781.18		OH	4	0	-3781.39	-3781.14	-3781.22
OH	6	0	-3781.35	-3781.1	-3781.18		OH	6	0	-3781.39	-3781.15	-3781.22
H2O	5	0	-3782	-3781.75	-3781.82		H2O	5	0	-3782.02	-3781.77	-3781.84

## Sheet: CuCo
OnCu							OnCo
INT	S	Charge	E	H	G		INT	S	Charge	E	H	G
CAT	5	0	-3937.26	-3937.03	-3937.1		CAT	5	0	-3937.26	-3937.03	-3937.1
CAT	3	0	-3937.27	-3937.04	-3937.1		CAT	3	0	-3937.27	-3937.04	-3937.1
CAT	AF3	0	-3937.27	-3937.04	-3937.11		CAT	AF3	0	-3937.27	-3937.04	-3937.11
CAT	AF1	0	-3937.26	-3937.03	-3937.1		CAT	AF1	0	-3937.26	-3937.03	-3937.1
CAT	2	-1	-3937.39	-3937.17	-3937.23		CAT	2	-1	-3937.39	-3937.17	-3937.23
CAT	4	-1	-3937.39	-3937.16	-3937.23		CAT	4	-1	-3937.39	-3937.16	-3937.23
H	2	0	-3937.77	-3937.54	-3937.61		H	2	0	-3937.83	-3937.59	-3937.66
H	4	0	-3937.78	-3937.54	-3937.61		H	4	0	-3937.8	-3937.57	-3937.63
H2	3	0	-3938.44	-3938.2	-3938.27		H2	3	0	-3938.44	-3938.2	-3938.27
CO2	3	0	-4125.93	-4125.68	-4125.75		CO2	3	0	-4125.93	-4125.68	-4125.77
CO2	2	-1	-4126.05	-4125.81	-4125.88		CO2	2	-1	-4126.02	-4125.77	-4125.85
CO2	4	-1	-4126.02	-4125.79	-4125.86		CO2	4	-1	-4126.05	-4125.81	-4125.88
OCOH	2	0	-4126.44	-4126.18	-4126.26		OCOH	2	0	-4126.49	-4126.23	-4126.31
OCOH	4	0	-4126.44	-4126.18	-4126.26		OCOH	4	0	-4126.46	-4126.21	-4126.28
OCHO	2	0	-4126.45	-4126.19	-4126.27		OCHO	2	0	-4126.47	-4126.21	-4126.29
OCHO	4	0	-4126.45	-4126.2	-4126.28		OCHO	4	0	-4126.47	-4126.21	-4126.29
CO	3	0	-4050.62	-4050.38	-4050.46		CO	3	0	-4050.64	-4050.4	-4050.47
HOCOH	1	0	-4127.02	-4126.75	-4126.83		HOCOH	1	0	-4127.06	-4126.79	-4126.86
HOCOH	3	0	-4127.05	-4126.78	-4126.86		HOCOH	3	0	-4127.06	-4126.79	-4126.87
OCH2O	5	0	-4126.97	-4126.71	-4126.79		OCH2O	3	0	-4127	-4126.74	-4126.82
HCOOH	3	0	-4127.11	-4126.84	-4126.92		OCH2O	5	0	-4127	-4126.74	-4126.82
HCO	2	0	-4051.17	-4050.92	-4051		HCOOH	3	0	-4127.11	-4126.84	-4126.92
HCO	4	0	-4051.17	-4050.92	-4051		HCO	2	0	-4051.2	-4050.95	-4051.02
COH	2	0	-4051.11	-4050.86	-4050.93		HCO	4	0	-4051.2	-4050.95	-4051.02
COH	4	0	-4051.11	-4050.86	-4050.94		COH	2	0	-4051.16	-4050.91	-4050.98
HOCH2O	2	0	-4127.63	-4127.35	-4127.43		COH	4	0	-4051.16	-4050.91	-4050.98
HOCH2O	4	0	-4127.63	-4127.35	-4127.43		HOCH2O	2	0	-4127.66	-4127.38	-4127.45
HOCHOH	4	0	-4127.63	-4127.35	-4127.43		HOCH2O	4	0	-4127.66	-4127.38	-4127.46
CH2O	3	0	-4051.82	-4051.56	-4051.64		HOCHOH	2	0	-4127.66	-4127.38	-4127.45
HCOH	3	0	-4051.72	-4051.46	-4051.54		HOCHOH	4	0	-4127.65	-4127.38	-4127.45
HCOH	5	0	-4051.72	-4051.46	-4051.53		CH2O	3	0	-4051.83	-4051.56	-4051.64
HOCH2OH	3	0	-4128.29	-4128	-4128.08		HCOH	1	0	-4051.77	-4051.51	-4051.59
CH3O	2	0	-4052.37	-4052.1	-4052.18		HCOH	3	0	-4051.77	-4051.51	-4051.59
CH3O	4	0	-4052.36	-4052.09	-4052.17		HCOH	5	0	-4051.78	-4051.52	-4051.59
H2COH	2	0	-4052.38	-4052.1	-4052.18		HOCH2OH	3	0	-4128.29	-4128	-4128.08
H2COH	4	0	-4052.38	-4052.1	-4052.18		CH3O	2	0	-4052.41	-4052.13	-4052.21
CH3OH	3	0	-4053.04	-4052.75	-4052.83		CH3O	4	0	-4052.41	-4052.13	-4052.21
C	3	0	-3975.13	-3974.89	-3974.97		H2COH	2	0	-4052.4	-4052.13	-4052.2
C	5	0	-3975.3	-3975.07	-3975.14		H2COH	4	0	-4052.39	-4052.12	-4052.2
CH	2	0	-3975.84	-3975.6	-3975.67		CH3OH	3	0	-4053.04	-4052.76	-4052.84
CH	4	0	-3975.83	-3975.58	-3975.65		C	1	0	-3975.23	-3975	-3975.07
CH2	3	0	-3976.44	-3976.19	-3976.27		C	3	0	-3975.23	-3975	-3975.07
CH2	5	0	-3976.42	-3976.17	-3976.24		CH	2	0	-3975.85	-3975.61	-3975.68
CH3	2	0	-3977.12	-3976.86	-3976.93		CH2	1	0	-3976.48	-3976.23	-3976.3
CH3	4	0	-3977.12	-3976.86	-3976.94		CH2	3	0	-3976.48	-3976.23	-3976.3
CH4	3	0	-3977.8	-3977.51	-3977.59		CH3	2	0	-3977.17	-3976.9	-3976.97
							CH3	4	0	-3977.14	-3976.88	-3976.95
							CH4	3	0	-3977.8	-3977.52	-3977.6
O	1	0	-4012.35	-4012.12	-4012.19		O	3	0	-4012.43	-4012.19	-4012.26
O	3	0	-4012.37	-4012.14	-4012.21		O	5	0	-4012.44	-4012.21	-4012.28
OH	2	0	-4013.05	-4012.81	-4012.88		OH	2	0	-4013.09	-4012.85	-4012.92
OH	4	0	-4013.04	-4012.8	-4012.88		OH	4	0	-4013.09	-4012.85	-4012.92
H2O	3	0	-4013.74	-4013.48	-4013.56		H2O	3	0	-4013.74	-4013.48	-4013.56

## Sheet: CuNi
OnCu							OnNi
INT	S	Charge	E	H	G		INT	S	Charge	E	H	G
CAT	4	0	-4062.81	-4062.58	-4062.65		CAT	4	0	-4062.81	-4062.58	-4062.65
CAT	2	0	-4062.81	-4062.58	-4062.65		CAT	2	0	-4062.81	-4062.58	-4062.65
CAT	AF2	0	-4062.81	-4062.58	-4062.65		CAT	AF2	0	-4062.81	-4062.58	-4062.65
CAT	1	-1	-4062.94	-4062.72	-4062.78		CAT	1	-1	-4062.94	-4062.72	-4062.78
CAT	3	-1	-4062.93	-4062.71	-4062.77		CAT	3	-1	-4062.93	-4062.71	-4062.77
H	1	0	-4063.32	-4063.09	-4063.16		H	1	0	-4063.35	-4063.12	-4063.18
H	3	0	-4063.33	-4063.1	-4063.17		H	3	0	-4063.35	-4063.11	-4063.18
H2	2	0	-4063.99	-4063.74	-4063.82		H2	2	0	-4063.99	-4063.74	-4063.82
CO2	2	0	-4251.47	-4251.23	-4251.3		CO2	2	0	-4251.48	-4251.23	-4251.31
CO2	1	-1	-4251.6	-4251.36	-4251.43		CO2	1	-1	-4251.6	-4251.36	-4251.43
CO2	3	-1	-4251.6	-4251.36	-4251.43		CO2	3	-1	-4251.6	-4251.36	-4251.43
OCOH	1	0	-4251.98	-4251.73	-4251.81		OCOH	1	0	-4252.01	-4251.76	-4251.83
OCOH	3	0	-4251.98	-4251.73	-4251.8		OCOH	3	0	-4252.01	-4251.76	-4251.83
OCHO	1	0	-4252	-4251.75	-4251.82		OCHO	1	0	-4252.02	-4251.76	-4251.84
OCHO	3	0	-4252.01	-4251.75	-4251.83		OCHO	3	0	-4252.02	-4251.76	-4251.84
CO	2	0	-4176.17	-4175.93	-4176.01		CO	2	0	-4176.17	-4175.93	-4176.01
HOCOH	2	0	-4252.59	-4252.33	-4252.4		HOCOH	2	0	-4252.61	-4252.35	-4252.42
OCH2O	4	0	-4252.52	-4252.25	-4252.33		HOCOH	4	0	-4252.61	-4252.35	-4252.42
HCOOH	2	0	-4252.65	-4252.38	-4252.46		HCOOH	2	0	-4252.65	-4252.38	-4252.46
HCO	1	0	-4176.71	-4176.47	-4176.54		HCO	1	0	-4176.75	-4176.5	-4176.57
HCO	3	0	-4176.71	-4176.46	-4176.53		HCO	3	0	-4176.75	-4176.5	-4176.57
COH	1	0	-4176.67	-4176.42	-4176.49		COH	1	0	-4176.69	-4176.45	-4176.52
COH	3	0	-4176.66	-4176.41	-4176.48		COH	3	0	-4176.69	-4176.44	-4176.52
HOCH2O	1	0	-4253.18	-4252.9	-4252.98		HOCH2O	1	0	-4253.19	-4252.91	-4252.99
HOCH2O	3	0	-4253.18	-4252.91	-4252.98		HOCH2O	3	0	-4253.19	-4252.91	-4252.99
HOCHOH	1	0	-4253.2	-4252.93	-4253		HOCHOH	1	0	-4253.18	-4252.9	-4252.97
CH2O	2	0	-4177.37	-4177.1	-4177.18		HOCHOH	3	0	-4253.22	-4252.94	-4253.01
HCOH	2	0	-4177.3	-4177.04	-4177.12		CH2O	2	0	-4177.37	-4177.1	-4177.18
HOCH2OH	2	0	-4253.84	-4253.55	-4253.62		HCOH	2	0	-4177.3	-4177.05	-4177.12
CH3O	1	0	-4177.92	-4177.65	-4177.73		HCOH	4	0	-4177.33	-4177.07	-4177.14
CH3O	3	0	-4177.93	-4177.66	-4177.73		HOCH2OH	2	0	-4253.84	-4253.54	-4253.62
H2COH	1	0	-4177.93	-4177.66	-4177.73		CH3O	1	0	-4177.93	-4177.66	-4177.74
H2COH	3	0	-4177.92	-4177.65	-4177.72		CH3O	3	0	-4177.94	-4177.66	-4177.74
CH3OH	2	0	-4178.59	-4178.3	-4178.38		H2COH	1	0	-4177.95	-4177.68	-4177.75
CH	1	0	-4101.38	-4101.14	-4101.21		H2COH	3	0	-4177.95	-4177.68	-4177.75
CH	3	0	-4101.32	-4101.08	-4101.15		CH3OH	2	0	-4178.58	-4178.3	-4178.38
CH2	2	0	-4101.99	-4101.74	-4101.81		C	2	0	-4100.72	-4100.49	-4100.55
CH2	4	0	-4101.98	-4101.74	-4101.8		C	4	0	-4100.7	-4100.47	-4100.54
CH3	1	0	-4102.67	-4102.41	-4102.48		CH	1	0	-4101.33	-4101.09	-4101.17
CH3	3	0	-4102.67	-4102.41	-4102.48		CH	3	0	-4101.33	-4101.09	-4101.16
CH4	2	0	-4103.34	-4103.06	-4103.14		CH2	2	0	-4102.02	-4101.77	-4101.84
							CH2	4	0	-4102.02	-4101.77	-4101.84
							CH3	1	0	-4102.69	-4102.43	-4102.5
							CH3	3	0	-4102.69	-4102.43	-4102.5
							CH4	2	0	-4103.34	-4103.06	-4103.14
O	2	0	-4137.91	-4137.68	-4137.75		O	2	0	-4137.93	-4137.7	-4137.77
O	4	0	-4137.94	-4137.7	-4137.78		O	4	0	-4137.95	-4137.72	-4137.79
OH	1	0	-4138.57	-4138.33	-4138.4		OH	1	0	-4138.62	-4138.38	-4138.45
OH	3	0	-4138.62	-4138.37	-4138.45		OH	3	0	-4138.62	-4138.38	-4138.45
H2O	2	0	-4139.28	-4139.03	-4139.1		H2O	2	0	-4139.28	-4139.02	-4139.1

## Sheet: CuCu - C1
OnCu
INT	S	Charge	E	H	G
CAT	3	0	-4194.97	-4194.75	-4194.81
CAT	AF1	0	-4194.98	-4194.75	-4194.82
CAT	2	-1	-4195.11	-4194.88	-4194.94
H	2	0	-4195.48	-4195.25	-4195.32
H2	AF1	0	-4196.15	-4195.91	-4195.98
CO2	AF1	0	-4383.64	-4383.39	-4383.47
CO2	2	-1	-4383.77	-4383.53	-4383.6
OCOH	2	0	-4384.15	-4383.89	-4383.97
OCHO	2	0	-4384.15	-4383.89	-4383.97
CO	AF1	0	-4308.33	-4308.1	-4308.16
HOCOH	AF1	0	-4384.75	-4384.49	-4384.56
HOCOH	1	0	-4384.75	-4384.49	-4384.56
HOCOH	3	0	-4384.75	-4384.49	-4384.56
HCOOH	AF1	0	-4384.82	-4384.55	-4384.63
HCO	2	0	-4308.87	-4308.63	-4308.7
COH	2	0	-4308.83	-4308.59	-4308.66
HOCH2O	2	0	-4385.34	-4385.06	-4385.14
HOCHOH	2	0	-4385.34	-4385.07	-4385.14
CH2O	AF1	0	-4309.53	-4309.27	-4309.35
HCOH	AF1	0	-4309.47	-4309.21	-4309.28
HCOH	1	0	-4309.47	-4309.21	-4309.28
HCOH	3	0	-4309.46	-4309.2	-4309.28
HOCH2OH	AF1	0	-4386	-4385.71	-4385.79
CH3O	2	0	-4310.08	-4309.81	-4309.89
H2COH	2	0	-4310.09	-4309.81	-4309.89
CH3OH	AF1	0	-4310.75	-4310.46	-4310.54
C	3	0	-4232.9	-4232.67	-4232.74
CH	2	0	-4233.55	-4233.31	-4233.38
CH	4	0	-4233.53	-4233.29	-4233.36
CH2	1	0	-4234.14	-4233.89	-4233.97
CH2	3	0	-4234.2	-4233.95	-4234.02
CH3	2	0	-4234.83	-4234.57	-4234.64
CH4	AF1	0	-4235.51	-4235.23	-4235.31
O	1	0	-4270.07	-4269.83	-4269.91
O	3	0	-4270.08	-4269.85	-4269.92
OH	2	0	-4270.76	-4270.52	-4270.6
H2O	AF1	0	-4271.44	-4271.19	-4271.26

## Sheet: CuCu - C2
OnCu
INT	S	Charge	E	H	G
H2COH_OCOH	AF1	0	-4499.39	-4499.08	-4499.17
H2COH_HOCOH	2	0	-4499.94	-4499.63	-4499.7
H2COH_OCHOH	2	0	-4499.89	-4499.57	-4499.66
CH2_OCOH	2	0	-4423.48	-4423.2	-4423.28
CH3_OCOH	AF1	0	-4424.15	-4423.85	-4423.93
H2COH_H2COH	AF1	0	-4425.32	-4425	-4425.07
H2COH_CH2	2	0	-4349.4	-4349.1	-4349.18
Ethylene	AF1	0	-4273.59	-4273.31	-4273.38
Ethanol	AF1	0	-4350.08	-4349.76	-4349.84

## Sheet: CuZn
OnCu							OnZn
INT	S	Charge	E	H	G		INT	S		E	H	G
CAT	2	0	-4333.86	-4333.63	-4333.7		CAT	2	0	-4333.86	-4333.63	-4333.7
CAT	1	-1	-4333.97	-4333.75	-4333.81		CAT	1	-1	-4333.97	-4333.75	-4333.81
CAT	3	-1	-4333.93	-4333.7	-4333.77		CAT	3	-1	-4333.93	-4333.7	-4333.77
H	1	0	-4334.36	-4334.13	-4334.19		H	1	0	-4334.36	-4334.13	-4334.19
H	3	0	-4334.36	-4334.13	-4334.2		H	3	0	-4334.36	-4334.13	-4334.19
MHOH	2	0	-4334.98	-4334.74	-4334.81		MHOH	2	0	-4335.01	-4334.76	-4334.84
H2	2	0	-4335.03	-4334.79	-4334.86		H2	2	0	-4335.03	-4334.79	-4334.86
CO2	2	0	-4522.51	-4522.27	-4522.34		CO2	2	0	-4522.51	-4522.27	-4522.35
CO2	1	-1	-4522.65	-4522.4	-4522.48		CO2	1	-1	-4522.63	-4522.39	-4522.46
CO2	3	-1	-4522.59	-4522.35	-4522.43		CO2	3	-1	-4522.61	-4522.37	-4522.44
OCOH	1	0	-4523.03	-4522.77	-4522.84		OCOH	1	0	-4523.03	-4522.77	-4522.85
OCOH	3	0	-4523.03	-4522.78	-4522.85		OCOH	3	0	-4523.03	-4522.77	-4522.85
OCHO	1	0	-4523.03	-4522.77	-4522.85		OCHO	1	0	-4523.06	-4522.81	-4522.88
OCHO	3	0	-4523.01	-4522.76	-4522.83		OCHO	3	0	-4523.03	-4522.78	-4522.86
CO	2	0	-4447.21	-4446.97	-4447.04		CO	2	0	-4447.21	-4446.98	-4447.05
HOCOH	2	0	-4523.63	-4523.37	-4523.44		HOCOH	2	0	-4523.66	-4523.39	-4523.46
HOCOH	4	0	-4523.54	-4523.28	-4523.35		HOCOH	4	0	-4523.54	-4523.28	-4523.35
HCOOH	2	0	-4523.69	-4523.43	-4523.5		HCOOH	2	0	-4523.71	-4523.44	-4523.51
HCO	1	0	-4447.75	-4447.51	-4447.58		HCO	1	0	-4447.76	-4447.51	-4447.58
HCO	3	0	-4447.76	-4447.51	-4447.58		HCO	3	0	-4447.76	-4447.51	-4447.59
COH	1	0	-4447.7	-4447.46	-4447.53		COH	1	0	-4447.67	-4447.43	-4447.5
COH	3	0	-4447.69	-4447.45	-4447.52		COH	3	0	-4447.71	-4447.46	-4447.53
HOCH2O	1	0	-4524.21	-4523.94	-4524.01		HOCH2O	1	0	-4524.22	-4523.94	-4524.02
HOCH2O	3	0	-4524.21	-4523.94	-4524.02		HOCH2O	3	0	-4524.22	-4523.95	-4524.02
HOCHOH	3	0	-4524.21	-4523.94	-4524.01		HOCHOH	1	0	-4524.21	-4523.93	-4524
CH2O	2	0	-4448.41	-4448.15	-4448.22		HOCHOH	3	0	-4524.22	-4523.95	-4524.02
HCOH	2	0	-4448.34	-4448.09	-4448.16		CH2O	2	0	-4448.42	-4448.16	-4448.23
HCOH	4	0	-4448.29	-4448.03	-4448.1		HCOH	2	0	-4448.32	-4448.06	-4448.14
HOCH2OH	2	0	-4524.88	-4524.59	-4524.67		HCOH	4	0	-4448.29	-4448.03	-4448.11
CH3O	1	0	-4448.96	-4448.69	-4448.76		HOCH2OH	2	0	-4524.89	-4524.6	-4524.67
CH3O	3	0	-4448.96	-4448.69	-4448.77		CH3O	1	0	-4448.97	-4448.69	-4448.77
H2COH	1	0	-4448.96	-4448.69	-4448.77		CH3O	3	0	-4448.97	-4448.7	-4448.77
H2COH	3	0	-4448.96	-4448.69	-4448.77		H2COH	1	0	-4448.94	-4448.67	-4448.74
CH3OH	2	0	-4449.63	-4449.34	-4449.42		H2COH	3	0	-4448.97	-4448.7	-4448.78
C	2	0	-4371.79	-4371.56	-4371.63		CH3OH	2	0	-4449.64	-4449.36	-4449.43
C	4	0	-4371.75	-4371.52	-4371.59		C	2	0	-4371.76	-4371.53	-4371.61
CH	3	0	-4372.41	-4372.17	-4372.24		C	4	0	-4371.76	-4371.53	-4371.61
CH	5	0	-4372.34	-4372.11	-4372.18		CH	3	0	-4372.37	-4372.14	-4372.21
CH2	2	0	-4373.03	-4372.78	-4372.85		CH	5	0	-4372.34	-4372.1	-4372.18
CH2	4	0	-4373.03	-4372.78	-4372.85		CH2	2	0	-4373.05	-4372.8	-4372.87
CH3	1	0	-4373.71	-4373.45	-4373.52		CH2	4	0	-4373.03	-4372.78	-4372.85
CH3	3	0	-4373.71	-4373.45	-4373.52		CH3	1	0	-4373.7	-4373.44	-4373.51
CH4	2	0	-4374.39	-4374.11	-4374.18		CH3	3	0	-4373.71	-4373.45	-4373.52
							CH4	2	0	-4374.38	-4374.11	-4374.18
O	2	0	-4408.95	-4408.71	-4408.78		O	2	0	-4408.98	-4408.75	-4408.82
O	4	0	-4408.96	-4408.73	-4408.8		OH	1	0	-4409.66	-4409.42	-4409.5
OH	1	0	-4409.63	-4409.39	-4409.46		OH	3	0	-4409.64	-4409.4	-4409.47
OH	3	0	-4409.64	-4409.4	-4409.47		H2O	2	0	-4410.34	-4410.08	-4410.16
H2O	2	0	-4410.32	-4410.07	-4410.14
