# Supplementary material for: Hetero-bimetallic paddlewheel complexes for enhanced CO 2 reduction selectivity in MOFs: a first principles study
Source: Royal Society of Chemistry journal article supplement (doi:10.1039/d3cp05694e), 2024-01-01
Supplement: d3cp05694e2.pdf [file d3cp05694e2.pdf]

# Hetero-Bimetallic Paddlewheel Complexes for Enhanced CO<sub>2</sub> Reduction Selectivity: A First Principles Study

Gavin A. McCarver,\* Taner Yildirim, and Wei Zhou

*National Institute of Standards and Technology, Center for Neutron Research,  
Gaithersburg, Maryland 20899-6102, United States*

E-mail: gavin.mccarver@nist.gov

## SUPPLEMENTARY INFORMATION

### List of Tables

|    |                                                                                                                                                                                                                                                                                                        |   |
|----|--------------------------------------------------------------------------------------------------------------------------------------------------------------------------------------------------------------------------------------------------------------------------------------------------------|---|
| S1 | Adsorption free energies of reaction products on the paddlewheel complexes. Negative values indicate favorable binding. Values given in eV. . . . .                                                                                                                                                    | 3 |
| S2 | Geometric parameters of the paddlewheel complexes. Intermetallic bond distances ( $R_{Cu-X}$ ) given in Å and bond angles ( $A_{O-X-O}$ ) given in degrees. . . . .                                                                                                                                    | 3 |
| S3 | Löwdin spin populations and relative electronic energies on the paddlewheel complexes. AF refers to an antiferromagnetically coupled spin state while FM refers to a ferromagnetic spin state. Column headings refer to the metal site with X being the substituent metal (Mn, Co, Ni, or Cu). . . . . | 4 |

## List of Figures

|    |                                                                                                                                                                                                                             |   |
|----|-----------------------------------------------------------------------------------------------------------------------------------------------------------------------------------------------------------------------------|---|
| S1 | Free energy reaction mechanism for the reduction of CO <sub>2</sub> on the Cu site of the Cu-Zn paddlewheel complex. Competing intermediates shown in red. Limiting potential values shown in blue and given in eV. . . . . | 4 |
| S2 | Free energy reaction mechanism for the reduction of CO <sub>2</sub> on the Zn site of the Cu-Zn paddlewheel complex. Competing intermediates shown in red. Limiting potential values shown in blue and given in eV. . . . . | 5 |
| S3 | Free energy reaction mechanism for the reduction of CO <sub>2</sub> on the Cu site of the Cu-Co paddlewheel complex. Competing intermediates shown in red. Limiting potential values shown in blue and given in eV. . . . . | 5 |

Table S1: Adsorption free energies of reaction products on the paddlewheel complexes. Negative values indicate favorable binding. Values given in eV.

|       | Site | H <sub>2</sub> | CO <sub>2</sub> | HCOOH | CO    | CH <sub>2</sub> O | CH <sub>3</sub> OH | CH <sub>4</sub> | H <sub>2</sub> O |
|-------|------|----------------|-----------------|-------|-------|-------------------|--------------------|-----------------|------------------|
| Cu-Cu | Cu   | 0.27           | 0.40            | 0.20  | 0.31  | 0.15              | 0.12               | 0.33            | 0.14             |
| Cu-Mn | Cu   | 0.31           | 0.45            | 0.33  | -0.20 | 0.24              | 0.23               | 0.40            | 0.18             |
|       | Mn   | 0.07           | 0.07            | -0.37 | -0.23 | -0.32             | -0.42              | 0.08            | -0.50            |
| Cu-Co | Cu   | 0.21           | 0.42            | 0.12  | 0.14  | 0.09              | 0.01               | 0.29            | -0.02            |
|       | Co   | 0.12           | 0.12            | -0.00 | -0.23 | -0.07             | -0.11              | 0.18            | -0.13            |
| Cu-Ni | Cu   | 0.27           | 0.43            | 0.23  | 0.11  | 0.16              | 0.11               | 0.36            | 0.09             |
|       | Ni   | 0.22           | 0.33            | 0.22  | 0.15  | 0.15              | 0.11               | 0.32            | 0.19             |

Table S2: Geometric parameters of the paddlewheel complexes. Intermetallic bond distances ( $R_{\text{Cu-X}}$ ) given in Å and bond angles ( $A_{\text{O-X-O}}$ ) given in degrees.

|       | $R_{\text{Cu-X}}$ | $A_{\text{O-Cu-O}}$ | $A_{\text{O-X-O}}$ |
|-------|-------------------|---------------------|--------------------|
| Cu-Mn | 2.812             | 175.5               | 152.9              |
| Cu-Co | 2.438             | 170.6               | 178.8              |
| Cu-Ni | 2.445             | 171.1               | 177.9              |
| Cu-Cu | 2.573             | 172.0               | 172.0              |

Table S3: Löwdin spin populations and relative electronic energies on the paddlewheel complexes. AF refers to an antiferromagnetically coupled spin state while FM refers to a ferromagnetic spin state. Column headings refer to the metal site with X being the substituent metal (Mn, Co, Ni, or Cu).

|       | Spin State | Cu      | X       | Relative Energy (kcal mol <sup>-1</sup> ) |
|-------|------------|---------|---------|-------------------------------------------|
| Cu-Cu | FM3        | 0.6180  | 0.6180  | 1.7                                       |
|       | AF1        | 0.6101  | -0.6101 | 0.0                                       |
| Cu-Mn | FM7        | 0.6534  | 4.6600  | 1.3                                       |
|       | AF5        | -0.5301 | 4.6028  | 0.0                                       |
| Cu-Co | FM5        | 0.6585  | 2.6129  | 3.6                                       |
|       | AF3        | -0.5318 | 2.6066  | 3.3                                       |
|       | FM3        | 0.6717  | 0.9552  | 0.0                                       |
|       | AF1        | 0.5534  | -0.9784 | 1.0                                       |
| Cu-Ni | FM4        | 0.6683  | 1.6150  | 4.8                                       |
|       | FM2        | 0.6296  | 0.0061  | 0.0                                       |

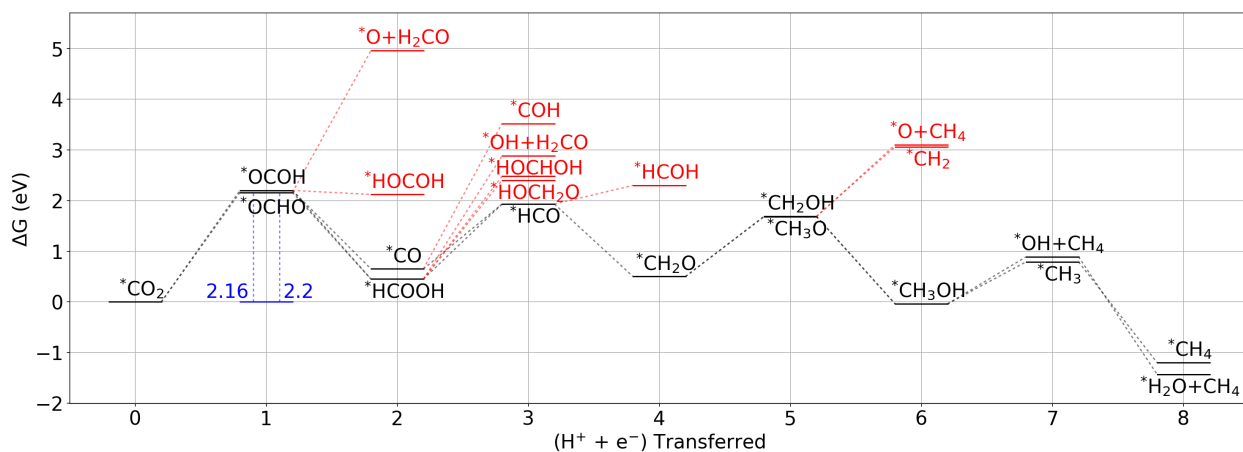

Figure S1: Free energy reaction mechanism for the reduction of CO<sub>2</sub> on the Cu site of the Cu-Zn paddlewheel complex. Competing intermediates shown in red. Limiting potential values shown in blue and given in eV.

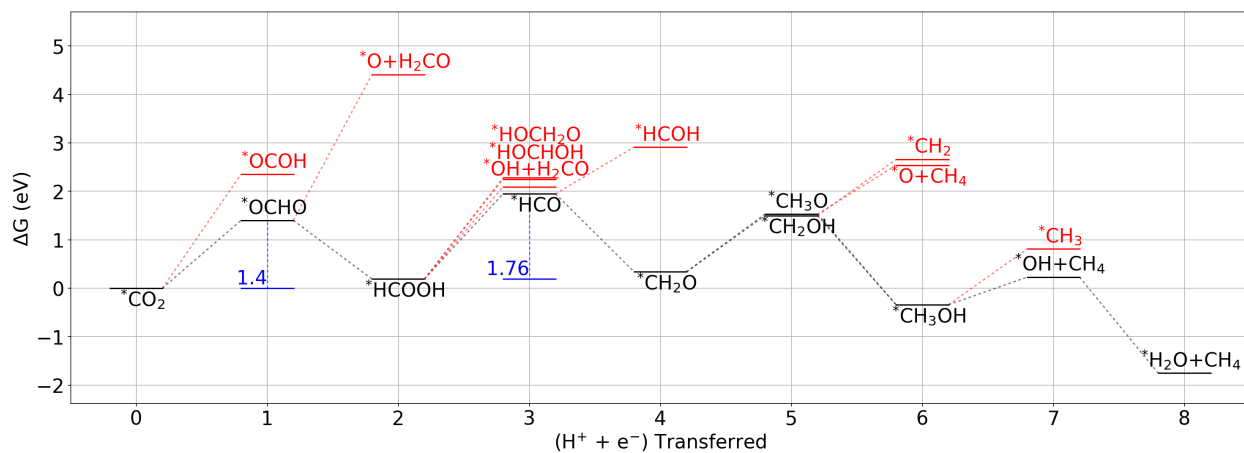

Figure S2: Free energy reaction mechanism for the reduction of  $\text{CO}_2$  on the Zn site of the Cu-Zn paddlewheel complex. Competing intermediates shown in red. Limiting potential values shown in blue and given in eV.

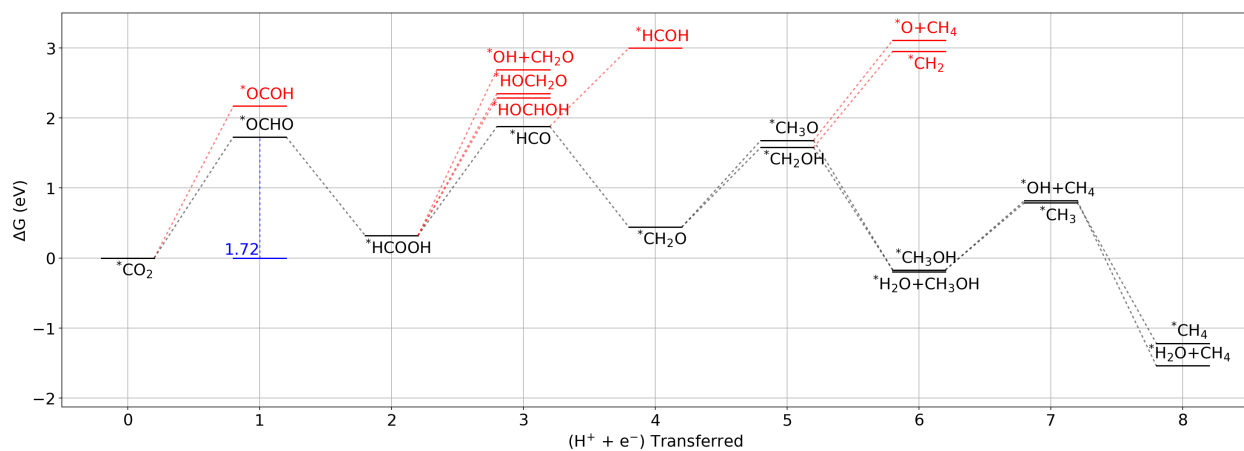

Figure S3: Free energy reaction mechanism for the reduction of  $\text{CO}_2$  on the Cu site of the Cu-Co paddlewheel complex. Competing intermediates shown in red. Limiting potential values shown in blue and given in eV.
